# Supplementary material for: Exceptionally high rates of positive selection on the rbcL gene in the genus Ilex (Aquifoliaceae)
Source: BMC Evol Biol. 2019 Oct 21;19:192. doi: 10.1186/s12862-019-1521-1 (PMC6805373; doi:10.1186/s12862-019-1521-1)
Supplement: Supplementary file 1 — Additional file 1: Table S1. List of world-wide Ilex species [32]. In bold, species used in the 20-species analyses. [file 12862_2019_1521_MOESM1_ESM.xls]

## Sheet: Sheet1
Supplementary Table 1. List of world-wide Ilex species (Manen et al., 2010). In bold, species used in the 20-species analyses.
Group	Ilex species	Vouchers	Distribution	GenBank accession number
Group 1	Ilex amelanchier 100	S. Andrews SA1475	USA	X98722
	Ilex crenata 14	H. Nagamasu (-)	East Asia	L01928
	Ilex maximowicziana 02	H. Nagamasu 5036	East Asia	AJ492715
	Ilex mucronata 153	S. Andrews SA1466	USA	X69747
	Ilex mutchagara 95	S. Andrews SA1506	East Asia	AJ492712
	Ilex pedunculosa 75	S. Andrews SA1503	East Asia	X98728
	Ilex purpurea 123	S. Andrews SA1529	East Asia	AJ492711
	Ilex purpurea 97	S. Andrews SA1470	East Asia	AJ492710
	Ilex revoluta 132	S. Andrews SA1584	Borneo	AJ492714
	Ilex shennongjiaensis 156	S. Andrews SA1530	East Asia	AJ492707
	Ilex sugerokii 149	S. Andrews SA1523	East Asia	AJ492709
	Ilex triflora 129	S. Andrews SA1578	South East Asia	AJ492713
	Ilex yunnanensis 157	Bot. Gard. Munich (-)	East Asia	FJ394653
	Ilex yunnanensis 54	S. Andrews SA1508	East Asia	AJ275346
Group 2	Ilex canariensis 90	S. Andrews SA1488	Canary Islands	X98727
	Ilex aculeolata 140	Zhong Shu Hua (-)	East Asia	FJ394587
	Ilex sp. nov. 501	L.A. Craven (-)	Australia	FJ394640
	Ilex arnhemensis 502	L.A. Craven (-)	Australia	FJ394590
	Ilex cissoidea 163	S. Andrews SA860	South East Asia	FJ394596
	Ilex collina 81	S. Andrews SA1479	USA	AJ492716
	Ilex coriacea 147	S. Andrews SA1536	USA, Mexico	FJ394599
	Ilex curtissii 122	S. Andrews SA1543	USA	FJ394603
	Ilex cymosa 172	S. Andrews SA1570	South East Asia	FJ394604
	Ilex decidua 73	S. Andrews SA1474	USA	X98724
	Ilex fragilis 152	C.J. Wingfield (-)	East Asia	FJ394612
	Ilex geniculata 125	S. Andrews SA1527	East Asia	FJ394613
	Ilex glabra 143	S. Andrews SA1468	Canada, USA	AJ492720
	Ilex goshiensis 10	H. Nagamasu 5035	East Asia	X98734
	Ilex havilandii 131	S. Andrews SA1586	Borneo	FJ394615
	Ilex kusanoi 158	S. Andrews SA1512	East Asia	FJ394622
	Ilex laevigata 114	S. Andrews SA1507	USA	FJ394623
	Ilex longipes 77	S. Andrews SA1472	USA	FJ394625
	Ilex macrocarpa 76	S. Andrews SA1479	East Asia	AJ492727
	Ilex macropoda 91	S. Andrews SA1514	East Asia	AJ492726
	Ilex maingayi 148	S. Andrews SA1571	South East Asia	FJ394626
	Ilex micrococca 79	S. Andrews SA1498	East Asia	X98721
	Ilex mitis 63	S. Andrews SA1456	Africa	X98730
	Ilex montana 121	S. Andrews SA1546	USA	FJ394629
	Ilex nervulosa 165	S. Andrews SA1573	South East Asia	FJ394630
	Ilex oppositifolia 134	S. Andrews SA1594	Borneo	AJ492719
	Ilex rotunda 04	H. Nagamasu 5221	East Asia	X98720
	Ilex rotunda 167	S. Andrews SA1569	East Asia	FJ394637
	Ilex serrata 78	S. Andrews SA1477	East Asia	AJ492718
	Ilex spicata 133	S. Andrews SA1592	South East Asia	FJ394641
	Ilex tsoii 151	S. Andrews SA1528	East Asia	FJ394645
	Ilex verticillata 59	P. Ferard (-)	Canada, USA	AJ492717
	Ilex wallichii 154	S. Andrews SA1572	Borneo	FJ394646
	Ilex wallichii 173	S. Andrews SA1576	South East Asia	FJ394647
	Ilex wilsonii 86	S. Andrews SA1500	East Asia	FJ394649
	Ilex zygophylla 130	S. Andrews SA1581	Borneo	FJ394655
Group 3	Ilex amara H301	R. Harley 26229	South America	FJ394588
	Ilex anomala 101	C. Imada et al. (-)	Hawaii	X98723
	Ilex argentina 139	G. Giberti 507	South America	AJ492699
	Ilex asperula H303	J.N. Nakayima 1350	South America	FJ394591
	Ilex brasiliensis 102	G. Giberti BACP105	South America	X98735
	Ilex brevicuspis 105	G. Giberti BACP99	South America	X98719
	Ilex cassine 06	P.-A. Loizeau no voucher	USA, Mexico, Bahamas, Cuba	AJ492704
	Ilex chamaedryfolia 117	G. Hatschbach 61.222	South America	FJ394594
	Ilex cumulicola 160	S. Andrews SA1537	USA	FJ394602
	Ilex discolor 108	A.M. Olivo (-)	Mexico	FJ394607
	Ilex dugesii 98	S. Andrews SA1497	Mexico	FJ394608
	Ilex dumosa 103	G. Giberti no voucher	South America	X98725
	Ilex guianensis H7	D'Arcy et al. 15500	South America-Mexico	AJ492706
	Ilex integerrima 106	G. Giberti BACP114	South America	X98726
	Ilex laurina H1	Wallnöfer 15-5788	South America	AJ492730
	Ilex liebmannii 71	S. Andrews SA1463	Central America, Mexico	AJ492700
	Ilex microdonta 118	G. Hatschbach 61.224	South America	AJ492702
	Ilex nitida 80	G.J. Breckon (-)	Jamaica, Puerto Rico	FJ394631
	Ilex opaca 92	S. Andrews SA1483	USA	FJ394633
	Ilex paraguariensis 146	S. Andrews SA1490	South America	FJ394634
	Ilex pseudobuxus 104	G. Giberti BACP113	South America	X98736
	Ilex quercetorum 126	S. Andrews SA1531	America	FJ394636
	Ilex repanda 119	S. Andrews SA1521	Bahamas, Cuba	AJ492697
	Ilex rubra 83	S. Andrews SA1496	Mexico	FJ394638
	Ilex sebertii 401	(-) (-)	New Caledonia	FJ394639
	Ilex teratopis H10	Smith et al. 13150	South America	AJ492695
	Ilex theezans 115	G. Hatschbach 61.225	South America	FJ394643
	Ilex theezans 116	G. Hatschbach 61.223	South America	AJ492703
	Ilex tolucana 89	S. Andrews SA1491	Mexico, Honduras, Salvador	FJ394644
	Ilex vomitoria 66	S. Andrews SA1461	USA, Mexico	M88583
	Ilex x attenuata 74	S. Andrews SA1515	USA	FJ394650
Group 4	Ilex aquifolium 136	S. Andrews SA1487	Europe, N.Africa	FJ394589
	Ilex bioritsensis 142	S. Andrews SA1480	East Asia	FJ394592
	Ilex buergeri 11	H. Nagamasu 5369	East Asia	FJ394593
	Ilex ciliospinosa 168	S. Andrews SA1484	East Asia	FJ394595
	Ilex colchica 67	S. Andrews SA1458	Europe, Asia	FJ394597
	Ilex corallina 88	S. Andrews SA1517	East Asia	FJ394598
	Ilex cornuta 57	P.Ferard (-)	East Asia	FJ394600
	Ilex cornuta 61	S. Andrews SA1452	East Asia	FJ394601
	Ilex cyrtura 60	S. Andrews SA1455	East Asia	FJ394605
	Ilex dimorphophylla 08	H. Nagamasu 5370	East Asia	FJ394606
	Ilex fargesii 124	S. Andrews SA1495	East Asia	FJ394610
	Ilex fargesii 68	S. Andrews SA1453	East Asia	FJ394609
	Ilex ficoidea 85	S. Andrews SA1505	East Asia	FJ394611
	Ilex georgei 65	S. Andrews SA1454	East Asia	FJ394614
	Ilex hookeri 72	S. Andrews SA1464	East Asia	FJ394616
	Ilex hylonoma 138	Zhong Shu Hua (-)	East Asia	FJ394617
	Ilex integra 05	P.-A. Loizeau no voucher	East Asia	FJ394618
	Ilex integra 09	H. Nagamasu 5073	East Asia	FJ394619
	Ilex kinabaluensis 166	S. Andrews SA1580	Borneo	FJ394620
	Ilex kingiana 144	S. Andrews SA1494	East Asia	FJ394621
	Ilex latifolia 62	S. Andrews SA1462	East Asia	X98731
	Ilex leucoclada 159	S. Andrews SA1542	East Asia	AJ492728
	Ilex liukiuensis 17	H. Nagamasu 5034	East Asia	FJ394624
	Ilex matanoana 12	A. Soejima 930210	East Asia	FJ394627
	Ilex mertensii 03	A. Soejima 930208	East Asia	FJ394628
	Ilex nothofagifolia 82	S. Andrews SA1499	East Asia	FJ394632
	Ilex perado 56	P. Ferard (-)	Canaries	X98729
	Ilex pernyi 53	Youg-Ming Yuan (-)	East Asia	FJ394635
	Ilex rugosa 16	H. Nagamasu (-)	East Asia	X98733
	Ilex spinigera 93	S. Andrews SA1502	Caucasus	FJ394642
	Ilex warburgii 01	H. Nagamasu 5033	East Asia	FJ394648
	Ilex x kiusiana 170	S. Andrews SA1552	East Asia	FJ394651
	Ilex x makinoi 169	S. Andrews SA1520	East Asia	FJ394652
	Ilex zhejiangensis 99	S. Andrews SA1493	East Asia	FJ394654
