# Supplementary material for: Exceptionally high rates of positive selection on the rbcL gene in the genus Ilex (Aquifoliaceae)
Source: BMC Evol Biol. 2019 Oct 21;19:192. doi: 10.1186/s12862-019-1521-1 (PMC6805373; doi:10.1186/s12862-019-1521-1)
Supplement: Supplementary file 2 — Additional file 2: Table S2. List of Chinese Ilex species studied here. [file 12862_2019_1521_MOESM2_ESM.xls]

## Sheet: Feuil1
Supplementary Table 2. List of Chinese Ilex species studied here.
Group	Sample ID	Species	Voucher	GeneBank accession number
Group 1	Ilex atrata_1679_conS3	Ilex atrata	yx1698	KX897100
	Ilex chinensis_169	Ilex chinensis	yx169	KX897029
	Ilex crenata_1625	Ilex crenata	yx1625	KX897082
	Ilex dasyphylla_1736_conS2	Ilex dasyphylla	yx1736	KX897109
	Ilex denticulata_1683	Ilex denticulata	yx1683	KX897097
	Ilex dunniana_1624	Ilex dunniana	yx1624	KX897081
	Ilex editicostata_1762	Ilex editicostata	yx1762	KX897115
	Ilex ficifolia_119_con	Ilex ficifolia	yx119	KX897013
	Ilex ficifolia_122_conS3	Ilex ficifolia	yx122	KX897016
	Ilex forrestii_1694	Ilex forrestii	yx1694	KX897099
	Ilex hanceana_1483	Ilex hanceana	yx1483	KX897056
	Ilex intermedia_115	Ilex ntermedia	yx115	KX897012
	Ilex kwangtungensis_145_con	Ilex kwangtungensis	yx145	KX897025
	Ilex litseifolia_1760	Ilex litseifolia	yx1760	KX897114
	Ilex longecaudata_1713_con	Ilex longecaudata	yx1713	KX897101
	Ilex nanningensis_1510_conS3	Ilex nanningensis	yx1510	KX897059
	Ilex oblonga_1369	Ilex oblonga	yx1369	KX897040
	Ilex pedunculosa_100	Ilex pedunculosa	yx100	KX897003
	Ilex pedunculosa_104	Ilex pedunculosa	yx104	KX897007
	Ilex suaveolens_1650	Ilex suaveolens	yx1650	KX897087
	Ilex subcrenata_1577_conS3	Ilex subcrenata	yx1577	KX897070
	Ilex szechwanensis_103	Ilex szechwanensis	yx103	KX897006
	Ilex szechwanensis_1418_conS2	Ilex szechwanensis	yx1418	KX897047
	Ilex viridis_173_con	Ilex viridis	yx173	KX897030
	Ilex yuiana_1727	Ilex yuana	yx1727	KX897106
	Ilex sp._120	Ilex sp.	yx120	KX897014
	Ilex sp._135_con	Ilex sp.	yx135	KX897021
	Ilex sp._1363_2	Ilex sp.	yx1363	KX897039
	Ilex sp._1476	Ilex sp.	yx1476	KX897051
	Ilex sp._1481	Ilex sp.	yx1481	KX897054
	Ilex sp._1598	Ilex sp.	yx1598	KX897075
	Ilex sp._1639	Ilex sp.	yx1639	KX897085
	Ilex sp._1719	Ilex sp.	yx1719	KX897103
	Ilex sp._1754	Ilex sp.	yx1754	KX897112
	Ilex sp._1767	Ilex sp.	yx1767	KX897118
	Ilex sp._1780	Ilex sp.	yx1780	KX897124
	Ilex sp._1781	Ilex sp.	yx1781	KX897125
	Ilex sp._1782	Ilex sp.	yx1782	KX897126
	Ilex sp._1783_2	Ilex sp.	yx1783	KX897127
Group 2	Ilex aculeolata_1375	Ilex aculeolata	yx1375	KX897041
	Ilex asprella_1376	Ilex asprella	yx1376	KX897042
	Ilex championii_1742_con	Ilex championii	yx1742	KX897110
	Ilex chapaensis_1322	Ilex chapaensis	yx1322	KX897035
	Ilex elmerrilliana_1766_con	Ilex elmerrilliana	yx1766	KX897117
	Ilex fragilis_1771_conS3	Ilex fragilis	yx1771	KX897121
	Ilex godajam_1314 ?umbellulata?	Ilex godajam	yx1314	KX897033
	Ilex lihuaensis_1651_conS2	Ilex lihuaensis	yx1651	KX897088
	Ilex lohfauensis_139_con	Ilex lohfauensis	yx139	KX897024
	Ilex machilifolia_1675_conS3	Ilex machilifolia	yx1675	KX897092
	Ilex macrocarpa_1379_conS3	Ilex macrocarpa	yx1379	KX897043
	Ilex macrocarpa_1386	Ilex macrocarpa	yx1386	KX897045
	Ilex macropoda_101	Ilex macropoda	yx101	KX897004
	Ilex mamillata_1338_con	Ilex mamillata	yx1338	KX897038
	Ilex manneiensis_1398_conS3	Ilex manneiensis	yx1398	KX897046
	Ilex memecylifolia_1482	Ilex memecylifolia	yx1482	KX897055
	Ilex micrococca_1773	Ilex micrococca	yx1773	KX897122
	Ilex perlata_1607	Ilex perlata	yx1607	KX897077
	Ilex polyneura_1316	Ilex polyneura	yx1316	KX897034
	Ilex polyneura_1680_con	Ilex polyneura	yx1680	KX897095
	Ilex pubescens_1676_ass_1	Ilex pubescens	yx1676	KX897093
	Ilex pubescens_1732_con	Ilex pubescens	yx1732	KX897108
	Ilex rotunda_110	Ilex rotunda	yx110	KX897011
	Ilex rotunda_1557_conS3	Ilex rotunda	yx1557	KX897066
	Ilex serrata_105	Ilex serrata	yx105	KX897008
	Ilex sinica_1336	Ilex sinica	yx1336	KX897037
	Ilex stewardii_1592	Ilex stewardii	yx1592	KX897073
	Ilex tsoii_160_1	Ilex tsoi	yx160	KX897027
	Ilex tsoii_176_con	Ilex tsoi	yx176	KX897031
	Ilex umbellulata_1499 ?godajam ?	Ilex umbellulata	yx1499	KX897058
	Ilex wilsonii_1748_conS3	Ilex wilsonii	yx1748	KX897111
	Ilex sp._131_con	Ilex sp.	yx131	KX897019
	Ilex sp._134_conS3	Ilex sp.	yx134	KX897020
	Ilex sp._136_con	Ilex sp.	yx136	KX897022
	Ilex sp._1472	Ilex sp.	yx1472	KX897050
	Ilex sp._1479	Ilex sp.	yx1479	KX897052
	Ilex sp._1594	Ilex sp.	yx1594	KX897074
	Ilex sp._1619	Ilex sp.	yx1619	KX897079
	Ilex sp._1620	Ilex sp.	yx1620	KX897080
	Ilex sp._1669	Ilex sp.	yx1669	KX897091
Group 4	Ilex bioritsensis_1519	Ilex bioritsensis	yx1519	KX897063
	Ilex bioritsensis_1574_conS2	Ilex bioritsensis	yx1574	KX897068
	Ilex buergeri_121	Ilex buergeri	yx121	KX897015
	Ilex chartacifolia_1465_conS2 (chartaceifolia)	Ilex chartacifolia	yx1465	KX897049
	Ilex cinerea_1484_conS3	Ilex cinerea	yx1484	KX897057
	Ilex cornuta_1565	Ilex cornuta	yx1565	KX897067
	Ilex dasyclada_1755_con	Ilex dasyclada	yx1755	KX897113
	Ilex delavayi_var._exalta_1518	Ilex delavayi var. exalta	yx1518	KX897062
	Ilex delavayi_var._exalta_1723_conS2	Ilex delavayi var. exalta	yx1723	KX897105
	Ilex dipyrena_1516 ?bioritsensis?	Ilex dipyrena	yx1516	KX897060
	Ilex excelsa_1730_conS2 (exsulca)	Ilex excelsa	yx1730	KX897107
	Ilex ficoidea_1385	Ilex ficoidea	yx1385	KX897044
	Ilex formosana_126_con	Ilex formosana	yx126	KX897018
	Ilex franchetiana_1575_con	Ilex franchetiana	yx1575	KX897069
	Ilex georgei_1649	Ilex georgei	yx1649	KX897086
	Ilex graciliflora_1480	Ilex graciliflora	yx1480	KX897053
	Ilex hylonoma_var._glabra_1764_con	Ilex hylonoma var. glabra	yx1764	KX897116
	Ilex sp._107_con (wugongshanensis )	Ilex sp.	yx107	KX897009
	Ilex sp._108_con (intermedia )	Ilex sp.	yx108	KX897010
	Ilex intricata_1770_2_conS3	Ilex intricata	yx1770	KX897120
	Ilex kaushue_1461	Ilex kaushue	yx1461	KX897048
	Ilex latifolia_124	Ilex latifolia	yx124	KX897017
	Ilex latifolia_1303_conS2	Ilex latifolia	yx1303	KX897032
	Ilex macrostigma_1520_con	Ilex macrostigma	yx1520	KX897064
	Ilex magnifica_sp.nov._1681_ass	Ilex magnifica sp.nov.	yx1681	KX897096
	Ilex melanotricha_1720	Ilex melanotricha	yx1720	KX897104
	Ilex perlata_1606	Ilex perlata	yx1606	KX897076
	Ilex pernyi_102	Ilex pernyi	yx102	KX897005
	Ilex perryana_1664	Ilex perryana	yx1664	KX897090
	Ilex pseudomachilifolia_1332	Ilex pseudomachilifolia	yx1332	KX897036
	Ilex sinica_1587	Ilex sinica	yx1587	KX897072
	Ilex subficoidea_161_con	Ilex subficoidea	yx161	KX897028
	Ilex subodorata_1586	Ilex subodorata	yx1586	KX897071
	Ilex tsiangiana_1517_con	Ilex tsiangiana	yx1517	KX897061
	Ilex zhejiangensis_1554_conS3	Ilex zhejiangensis	yx1554	KX897065
	Ilex sp._137_con	Ilex sp.	yx137	KX897023
	Ilex sp._147_con2	Ilex sp.	yx147	KX897026
	Ilex sp._1615	Ilex sp.	yx1615	KX897078
	Ilex sp._1628	Ilex sp.	yx1628	KX897083
	Ilex sp._1629	Ilex sp.	yx1629	KX897084
	Ilex sp._1654	Ilex sp.	yx1654	KX897089
	Ilex sp._1687	Ilex sp.	yx1687	KX897098
	Ilex sp._1715	Ilex sp.	yx1715	KX897102
	Ilex sp._1768_conS3 (probably latifolia)	Ilex sp.	yx1768	KX897119
	Ilex sp._1776	Ilex sp.	yx1776	KX897123
